# Supplementary material
Source: PubMed Central journal article supplement (PMC4112218)
Supplement: NIHMS57911-supplement-1.pdf [file NIHMS57911-supplement-1.pdf]

## **SUPPLEMENTARY INFORMATION GUIDE.**

### 1. Excel Table with

Sheet a: Index

Sheet b: aCGH candidate regions in mouse tumours

Sheet c: SNVs candidate in mouse tumours

Sheet d: WES Sequencing summary

Sheet e: Summary of recurrent mutations in mouse tumours
